# Supplementary material
Source: PubMed Central journal article supplement (PMC9767675)
Supplement: supplementary_table-3_ioac111.pdf [file supplementary_table-3_ioac111.pdf]

Supplementary Table-3

| D-BPG         | D-BPG   | D-BPG         | D-BPG         | D-BPG | D-EPG         | D-EPG    | D-EPG    | D-EPG   | D-EPG         |
|---------------|---------|---------------|---------------|-------|---------------|----------|----------|---------|---------------|
| CL1           | CL2     | CL3           | CL4           |       | CL1           | CL2      | CL3      | CL4     | CL5           |
| 2610008E11Rik | Abhd12  | 1190002N15Rik | 9030624J02Rik |       | 9230104L09Rik | Ajuba    | AI427809 | Acsbg1  | A730046J19Rik |
| 2810474O19Rik | Acyp2   | A730017C20Rik | Afap111       |       | Adamts19      | Anxa7    | Agpat5   | Actn1   | Aacs          |
| Abca1         | Akr1b7  | Aard          | Aftph         |       | Adck5         | Apc      | Aldh6a1  | Ahcy    | Acat1         |
| Adhfe1        | Arnt2   | Abat          | Agtr2         |       | Aebp1         | Arfgef1  | Ccdc88c  | Aprt    | Acbd4         |
| Akap7         | Calcr1  | Abi3bp        | Akap8l        |       | Ahnak         | Atp11b   | Cd55     | Arpc1b  | Adam10        |
| Akr1c14       | Ccnd2   | Abtb2         | Akirin1       |       | Alad          | Cab39    | Cdc27    | Bspry   | Add3          |
| Akr1cl        | Cd83    | Acsm3         | Ank           |       | Aldh1a2       | Calu     | Cgnl1    | Casp12  | Adora1        |
| Aldh3b1       | Cdk6    | Adamts1       | Arhgap31      |       | Ano1          | Coa5     | Chpf     | Ccnd1   | Agrn          |
| Angpt2        | Cdo1    | Adamts16      | Atp6ap1       |       | Aqp5          | Dnajc10  | Chst4    | Chaf1b  | Ak7           |
| Ankrd50       | Cited1  | Aff1          | B3galnt1      |       | Arl4c         | Dusp8    | Crlf1    | Col6a1  | Akap13        |
| Anxa3         | Clip3   | Aldh1a1       | Bbx           |       | Asic2         | Fkbp9    | Dnajc21  | Creb3   | Aldh1a7       |
| Ar            | Cotl1   | Aldh1b1       | Caskin1       |       | Azin1         | Hsp90aa1 | Eea1     | Creb5   | Ank3          |
| Arhgap29      | Cpa2    | Aldh2         | Ccdc170       |       | B4galt5       | Klf4     | Elavl2   | Csrp1   | Ankrd29       |
| Arhgap42      | Dnm2    | Amph          | Cd34          |       | B4galt6       | Mlec     | Ermp1    | Dbi     | Anpep         |
| Arhgef28      | Dpp10   | Ank2          | Cgn           |       | Bcar3         | Naa50    | Fbl      | Dctpp1  | Anxa1         |
| Armcx5        | Efhd2   | Aplp2         | Clstn2        |       | Bicc1         | Ncoa4    | Gfra4    | Dpm3    | Anxa11        |
| Asap2         | Fez1    | App           | Col9a2        |       | Bmp2          | Otud4    | Haus4    | Efna1   | Aox3          |
| Bcat1         | Gstm7   | Arhgef40      | Cpe           |       | Bnc2          | Ptprg    | Herc6    | Eif5a   | Aplp1         |
| Bicd1         | Hspb6   | Arl6ip1       | Cyp2j6        |       | Cav1          | Rasa1    | Il17rd   | Eps8l2  | Apoc1         |
| Bmp2k         | Ifitm1  | Armcx3        | Dhrs3         |       | Cd2ap         | Smc1a    | lpo5     | Fabp5   | Apoe          |
| Bmp3          | Itm2a   | Armcx6        | Dkk3          |       | Cd320         | Trim12c  | Irx5     | Fam129a | Arhgap26      |
| Bst2          | Kcnh1   | Atp2b4        | Edil3         |       | Cd9           | Ubn1     | Jph1     | Fgfr1   | Arhgef12      |
| Car8          | Kif26b  | Atp6v0e2      | Eif4e3        |       | Cebpb         | Ubr5     | Mat2b    | Frmd4b  | Arid5a        |
| Cdc42ep5      | Magi2   | B3gat1        | Epha7         |       | Cenpe         | Uchl1    | N4bp3    | Glul    | Arid5b        |
| Cdh12         | Mfap2   | Bambi         | Fam198a       |       | Colq          | Wwc2     | Nus1     | Hspb1   | Arsa          |
| Cfh           | Mlf1    | Bche          | Fkbp4         |       | Csgalnact1    |          | P2rx7    | Ifitm3  | Atf3          |
| Chka          | Mras    | Btg1          | Fkbp6         |       | Cst12         |          | Pcgf5    | Igfbp2  | Atp13a3       |
| Chn2          | Mt3     | Cachd1        | Fut8          |       | Cst8          |          | Pdcd4    | Illdr2  | Atp1b1        |
| Cnot1         | Mtch1   | Cacna1d       | Gdi1          |       | Ctnna1        |          | Pde10a   | Itgb8   | Atp2b1        |
| Cntnap5a      | Nnat    | Cadm4         | Gdpd1         |       | Cybrd1        |          | Plbd2    | Kif23   | Atp6v0e       |
| Col8a1        | Pcdh7   | Casp6         | Gja1          |       | D630039A03Rik |          | Raph1    | Krt17   | B2m           |
| Crispld2      | Popdc3  | Cdh23         | Gtf2a1        |       | Dcn           |          | Rarres1  | Lama5   | B3gnt7        |
| Ctsl          | Prdx1   | Cdk5          | Hsd3b1        |       | Ece1          |          | Rassf3   | Loxl2   | B3gnt9        |
| Ctxn3         | Ptgds   | Cdkn1b        | Hspa13        |       | Ehd2          |          | Rnf144b  | Mcm7    | B4galt1       |
| Cyp2j9        | Ptgis   | Cela1         | Hspa4         |       | Elf4          |          | Rpia     | Mical2  | B4galt4       |
| Ddah1         | Pwwp2b  | Chst15        | Itgb5         |       | Elov15        |          | Rsad2    | Mre11a  | Bace2         |
| Dennd5b       | Rel     | Cln3          | Itih5         |       | Ephb1         |          | Slc12a2  | Myl12a  | Bcam          |
| Dpf1          | Sema3c  | Clu           | Klhl25        |       | F11r          |          | Slc16a1  | Palld   | Bex2          |
| Dpp6          | Sh3bgr  | Cmb1          | Klhl5         |       | F3            |          | Slc44a1  | Pcna    | Boc           |
| Dst           | Slc15a2 | Cmtm3         | Lamb1         |       | Fam83g        |          | Slc4a3   | Pcx     | Bok           |
| Egfr          | Slco1a4 | Col18a1       | Map3k5        |       | Fhod3         |          | Stim1    | Pglyrp1 | Brca2         |

|                |         |           |         |  |          |  |          |          |          |
|----------------|---------|-----------|---------|--|----------|--|----------|----------|----------|
| <b>Entpd1</b>  | Smpdl3b | Col27a1   | Map4k4  |  | Flrt1    |  | Stom     | Plat     | Bub1     |
| <b>Epdr1</b>   | Sox4    | Col3a1    | Mapk6   |  | Gm2a     |  | Syne2    | Plp2     | C1qtnf1  |
| <b>Fam19a5</b> | Syt7    | Col5a2    | Matn2   |  | Gng13    |  | Tkt      | Ppl      | C2       |
| <b>Fdps</b>    | Tma7    | Colec12   | Myl9    |  | Got1     |  | Tmem255a | Prkcz    | Cacnb3   |
| <b>Gadd45g</b> | Traf1   | Cx3cl1    | Nrbp2   |  | Gprc5c   |  |          | Prr5l    | Cald1    |
| <b>Galnt7</b>  | Tspan15 | Cyp1b1    | Ntn4    |  | Hs3st3a1 |  |          | Rab32    | Capn6    |
| <b>Gas6</b>    | Tuba1a  | Dag1      | Ogt     |  | Hsd17b2  |  |          | Rasl11a  | Car9     |
| <b>Gdpd2</b>   | Txnip   | Dync1i1   | Os9     |  | Hspb8    |  |          | Rbbp8    | Casz1    |
| <b>Gls</b>     | Ucp2    | Ehd3      | P4ha1   |  | Igf1     |  |          | Rbm3     | Ccdc92   |
| <b>Gprasp1</b> | Unc119  | Eif4a2    | Pabpn1  |  | Ii16     |  |          | Rnaseh2b | Cd74     |
| <b>Gpsm1</b>   | Vcan    | Elovl2    | Pfn2    |  | Ii4ra    |  |          | Rps6ka3  | Cd82     |
| <b>Greb1</b>   | Zfp667  | Emc2      | Plk2    |  | Ipo7     |  |          | Samd4    | Cdc42bpb |
| <b>Greb1l</b>  | Zyx     | Emx2      | Plxnc1  |  | Irx3     |  |          | Scpep1   | Cdc42ep1 |
| <b>Gstm1</b>   |         | Etl4      | Rbbp6   |  | Isoc1    |  |          | Sptlc2   | Cdc42ep3 |
| <b>Gstm2</b>   |         | Etnk2     | Rlim    |  | Itpr1    |  |          | Tagln2   | Cdon     |
| <b>Gtf2e2</b>  |         | Fam110c   | Scd2    |  | Lnpep    |  |          | Tbrg1    | Celf2    |
| <b>Hey1</b>    |         | Fam3c     | Slc12a6 |  | Lrrc3b   |  |          | Tcof1    | Cenpb    |
| <b>Hif1a</b>   |         | Fam69a    | Slc27a1 |  | Lrrc8e   |  |          | Timp1    | Cep55    |
| <b>Hpgd</b>    |         | Fbn2      | Slc37a2 |  | Ly6d     |  |          | Tm4sf1   | Ces2g    |
| <b>Hsd17b7</b> |         | Fbxl17    | Smad3   |  | Man2b2   |  |          | Tmco1    | Chchd6   |
| <b>Hsph1</b>   |         | Fbxo21    | Sprn    |  | Mfsd2a   |  |          | Tmem196  | Chmp4b   |
| <b>Inha</b>    |         | Fkbp10    | Stk4    |  | Mme      |  |          | Tnfaip2  | Cish     |
| <b>Inhbb</b>   |         | Fmn12     | Stxbp6  |  | Mmp15    |  |          | Tpm4     | Clec2l   |
| <b>Itga6</b>   |         | Fndc5     | Tdrd5   |  | Mpzi2    |  |          | Trim6    | Clic4    |
| <b>Itga9</b>   |         | Foxl2     | Tle2    |  | Myc      |  |          | Tspan4   | Cnbp     |
| <b>Itm2b</b>   |         | Foxp1     | Tm9sf2  |  | Mycn     |  |          | Unc45b   | Cnn3     |
| <b>Kctd14</b>  |         | Foxp4     | Tmem178 |  | Myof     |  |          | Wnt2b    | Col12a1  |
| <b>Ldhb</b>    |         | G0s2      | Tmem86a |  | Naaa     |  |          | Wsb2     | Col4a2   |
| <b>Lipg</b>    |         | Gatm      | Tpd52   |  | Nckap5   |  |          | Xaf1     | Cry1     |
| <b>Lman1</b>   |         | Gm826     | Xylt2   |  | Nde1     |  |          | Zfp185   | Csrnp1   |
| <b>Lpl</b>     |         | Gpc4      | Zfhx4   |  | Nek7     |  |          |          | Ctdspl   |
| <b>Lrp4</b>    |         | Grem2     |         |  | Nmnat2   |  |          |          | Cth      |
| <b>Ltbp1</b>   |         | Gria3     |         |  | Nrn1     |  |          |          | Cxcl16   |
| <b>Mafb</b>    |         | Gstm6     |         |  | Nsmce1   |  |          |          | Cygb     |
| <b>Map1b</b>   |         | Hist2h2be |         |  | Pank3    |  |          |          | Dab2ip   |
| <b>Mgst1</b>   |         | Hmgcs1    |         |  | Pdpm     |  |          |          | Dbn1     |
| <b>Mical3</b>  |         | Hs3st1    |         |  | Pebp1    |  |          |          | Dennd4c  |
| <b>Mid1ip1</b> |         | Irf2bp2   |         |  | Plau     |  |          |          | Dgkz     |
| <b>Mro</b>     |         | Islr      |         |  | Plekhh3  |  |          |          | Dhcr24   |
| <b>Msrb2</b>   |         | Itm2c     |         |  | Ppfi1p1  |  |          |          | Dnajc6   |
| <b>Myo10</b>   |         | Kctd12    |         |  | Ppip5k2  |  |          |          | Dsp      |
| <b>Myo1b</b>   |         | Kitl      |         |  | Ppp2r2c  |  |          |          | Efhd1    |
| <b>Myo1e</b>   |         | Lama1     |         |  | Ppp4r2   |  |          |          | Egfl6    |
| <b>Naalad2</b> |         | Lbh       |         |  | Prkcb    |  |          |          | Ehd1     |
| <b>Ncald</b>   |         | Lbx2      |         |  | Procr    |  |          |          | Ei24     |
| <b>Ndrp2</b>   |         | Lmcd1     |         |  | Prune2   |  |          |          | Eif4h    |

|                 |          |          |         |
|-----------------|----------|----------|---------|
| <b>Nipal1</b>   | Lpar1    | Ptprb    | Eln     |
| <b>Nr5a2</b>    | Lrpap1   | Rhox8    | Emd     |
| <b>Nrip1</b>    | Lrrfp1   | Rpusd1   | Emp2    |
| <b>Nxn12</b>    | Maged1   | Scarb1   | Enpp2   |
| <b>Odf2</b>     | Maged2   | Sdc1     | Epcam   |
| <b>Olfml3</b>   | Mamld1   | Sdk2     | Epha2   |
| <b>Pak3</b>     | Marcks   | Sh3d19   | Ephb2   |
| <b>Pank1</b>    | Mgp      | Sh3tc2   | Ephb4   |
| <b>Pfkfb3</b>   | Mmp11    | Sipa12   | Epn3    |
| <b>Pla2r1</b>   | Mmp14    | Soat1    | Esco2   |
| <b>Pln</b>      | Mmp16    | Tbc1d4   | Esyt1   |
| <b>Plod2</b>    | Ncam1    | Timeless | Exoc3l4 |
| <b>Pls3</b>     | Nell1    | Tiparp   | Ezr     |
| <b>Plxna2</b>   | Nfatc4   | Tmem109  | Fam168b |
| <b>Polr1a</b>   | Notch2   | Tmem132a | Fam84b  |
| <b>Ppp1r14a</b> | Nr3c2    | Trim2    | Fbln1   |
| <b>Ppt1</b>     | Nrep     | Ttc38    | Fbln2   |
| <b>Prlr</b>     | Nsg1     | Tuba1c   | Fdxr    |
| <b>Prss23</b>   | Oit3     | Utrn     | Fgf3    |
| <b>Ptch1</b>    | Osbp15   | Wt1      | Filip11 |
| <b>Rabgap1l</b> | Pald1    |          | Flna    |
| <b>Rai14</b>    | Pbx2     |          | Fmnl1   |
| <b>Rai2</b>     | Pbx3     |          | Folr1   |
| <b>Rasd1</b>    | Pcdh11x  |          | Fosb    |
| <b>Rasgef1b</b> | Pced1b   |          | Galk1   |
| <b>Rgs22</b>    | Pcsk6    |          | Galnt4  |
| <b>Ryr2</b>     | Pde1a    |          | Gas1    |
| <b>S100a10</b>  | Pdzrn4   |          | Gata1   |
| <b>Sat2</b>     | Peg10    |          | Gata3   |
| <b>Scap</b>     | Pgrmc1   |          | Gbp2    |
| <b>Scg5</b>     | Pik3ip1  |          | Gdf9    |
| <b>Scube1</b>   | Pla2g4a  |          | Gjb3    |
| <b>Sfrp4</b>    | Plekhf1  |          | Glrx    |
| <b>Shisa9</b>   | Plin2    |          | Gm17660 |
| <b>Slc18a2</b>  | Prkar1b  |          | Gm1968  |
| <b>Slc23a2</b>  | Prkar2b  |          | Golim4  |
| <b>Slc25a30</b> | Ptn      |          | Gpc3    |
| <b>Slc25a37</b> | Pygb     |          | Gpcpd1  |
| <b>Slc25a42</b> | R3hdm1   |          | Gpd2    |
| <b>Slc40a1</b>  | Rasgrp1  |          | Gpm6a   |
| <b>Smarca1</b>  | Rassf2   |          | Grk5    |
| <b>Smoc1</b>    | Rgs2     |          | Gsn     |
| <b>Snca</b>     | Rnf152   |          | Gss     |
| <b>Socs2</b>    | Sbk1     |          | H2-D1   |
| <b>Son</b>      | Scara3   |          | H2-K1   |
| <b>Srgap1</b>   | Serpnb6a |          | H2-Q4   |

|                 |          |  |  |  |  |  |  |  |         |
|-----------------|----------|--|--|--|--|--|--|--|---------|
| <b>St3gal4</b>  | Serpine2 |  |  |  |  |  |  |  | Hdac5   |
| <b>St3gal5</b>  | Serpinf1 |  |  |  |  |  |  |  | Hdac7   |
| <b>Sym</b>      | Slc16a2  |  |  |  |  |  |  |  | Hdc     |
| <b>Tcf4</b>     | Slc16a4  |  |  |  |  |  |  |  | Herpud1 |
| <b>Tenm4</b>    | Slc22a17 |  |  |  |  |  |  |  | Hoxc5   |
| <b>Tgfa</b>     | Slc25a23 |  |  |  |  |  |  |  | Hoxc8   |
| <b>Thbs1</b>    | Slc4a2   |  |  |  |  |  |  |  | Hoxd9   |
| <b>Tmem45a</b>  | Simap    |  |  |  |  |  |  |  | Hspa2   |
| <b>Tmprss13</b> | Smarcd3  |  |  |  |  |  |  |  | Ii34    |
| <b>Top1</b>     | Smpx     |  |  |  |  |  |  |  | Irf5    |
| <b>Tpd52l1</b>  | Sox11    |  |  |  |  |  |  |  | Isoc2a  |
| <b>Trib2</b>    | Srgap3   |  |  |  |  |  |  |  | Itga3   |
| <b>Tspan18</b>  | St5      |  |  |  |  |  |  |  | Jup     |
| <b>Ubc</b>      | Stk39    |  |  |  |  |  |  |  | Kcnab1  |
| <b>Unc93b1</b>  | Stmn1    |  |  |  |  |  |  |  | Kcnd2   |
| <b>Wipi1</b>    | Supt3    |  |  |  |  |  |  |  | Kcne1l  |
| <b>Xist</b>     | Sytl4    |  |  |  |  |  |  |  | Kcnf1   |
| <b>Zeb1</b>     | Tcf12    |  |  |  |  |  |  |  | Kcnh6   |
| <b>Zfp292</b>   | Tet3     |  |  |  |  |  |  |  | Kdm3a   |
| <b>Zim1</b>     | Thbs2    |  |  |  |  |  |  |  | Kifc3   |
|                 | Tjp1     |  |  |  |  |  |  |  | Klf6    |
|                 | Tmem206  |  |  |  |  |  |  |  | Krt18   |
|                 | Tmx2     |  |  |  |  |  |  |  | Krt19   |
|                 | Tns3     |  |  |  |  |  |  |  | Krt7    |
|                 | Trabd2b  |  |  |  |  |  |  |  | Krt8    |
|                 | Tril     |  |  |  |  |  |  |  | Lama3   |
|                 | Trp53i11 |  |  |  |  |  |  |  | Lamb2   |
|                 | Tsc22d1  |  |  |  |  |  |  |  | Lfng    |
|                 | Ucp1     |  |  |  |  |  |  |  | Lgals2  |
|                 | Zfp41    |  |  |  |  |  |  |  | Lgals9  |
|                 | Zhx3     |  |  |  |  |  |  |  | Lgr5    |
|                 |          |  |  |  |  |  |  |  | Lhx9    |
|                 |          |  |  |  |  |  |  |  | Limch1  |
|                 |          |  |  |  |  |  |  |  | Lmna    |
|                 |          |  |  |  |  |  |  |  | Lmnb1   |
|                 |          |  |  |  |  |  |  |  | Loxl1   |
|                 |          |  |  |  |  |  |  |  | Lrrc7   |
|                 |          |  |  |  |  |  |  |  | Lsr     |
|                 |          |  |  |  |  |  |  |  | Ltbp3   |
|                 |          |  |  |  |  |  |  |  | Ltbp4   |
|                 |          |  |  |  |  |  |  |  | Luzp1   |
|                 |          |  |  |  |  |  |  |  | Lypd6b  |
|                 |          |  |  |  |  |  |  |  | Map1a   |
|                 |          |  |  |  |  |  |  |  | Map3k1  |
|                 |          |  |  |  |  |  |  |  | Mapk13  |
|                 |          |  |  |  |  |  |  |  | Mapk3   |

|  |  |  |  |  |  |  |  |  |         |
|--|--|--|--|--|--|--|--|--|---------|
|  |  |  |  |  |  |  |  |  | Mbnl3   |
|  |  |  |  |  |  |  |  |  | Mcl1    |
|  |  |  |  |  |  |  |  |  | Mcm6    |
|  |  |  |  |  |  |  |  |  | Me1     |
|  |  |  |  |  |  |  |  |  | Megf6   |
|  |  |  |  |  |  |  |  |  | Mest    |
|  |  |  |  |  |  |  |  |  | Met     |
|  |  |  |  |  |  |  |  |  | Mfge8   |
|  |  |  |  |  |  |  |  |  | Mpp2    |
|  |  |  |  |  |  |  |  |  | Msln    |
|  |  |  |  |  |  |  |  |  | Mt1     |
|  |  |  |  |  |  |  |  |  | Mt2     |
|  |  |  |  |  |  |  |  |  | Mtr     |
|  |  |  |  |  |  |  |  |  | Mxi1    |
|  |  |  |  |  |  |  |  |  | Mxra8   |
|  |  |  |  |  |  |  |  |  | Mybpc3  |
|  |  |  |  |  |  |  |  |  | Myo1c   |
|  |  |  |  |  |  |  |  |  | Myo1d   |
|  |  |  |  |  |  |  |  |  | Myzap   |
|  |  |  |  |  |  |  |  |  | Nab1    |
|  |  |  |  |  |  |  |  |  | Nav2    |
|  |  |  |  |  |  |  |  |  | Ncapg   |
|  |  |  |  |  |  |  |  |  | Ndrp1   |
|  |  |  |  |  |  |  |  |  | Ndufb4  |
|  |  |  |  |  |  |  |  |  | Necab3  |
|  |  |  |  |  |  |  |  |  | Nfib    |
|  |  |  |  |  |  |  |  |  | Nfil3   |
|  |  |  |  |  |  |  |  |  | Nfix    |
|  |  |  |  |  |  |  |  |  | Nid2    |
|  |  |  |  |  |  |  |  |  | Npc1    |
|  |  |  |  |  |  |  |  |  | Nr3c1   |
|  |  |  |  |  |  |  |  |  | Nrap    |
|  |  |  |  |  |  |  |  |  | Ntng1   |
|  |  |  |  |  |  |  |  |  | Nudt17  |
|  |  |  |  |  |  |  |  |  | Nxf3    |
|  |  |  |  |  |  |  |  |  | Oat     |
|  |  |  |  |  |  |  |  |  | Olfml2b |
|  |  |  |  |  |  |  |  |  | Oplah   |
|  |  |  |  |  |  |  |  |  | Orai1   |
|  |  |  |  |  |  |  |  |  | Pam     |
|  |  |  |  |  |  |  |  |  | Paqr8   |
|  |  |  |  |  |  |  |  |  | Pard6b  |
|  |  |  |  |  |  |  |  |  | Parva   |
|  |  |  |  |  |  |  |  |  | Parvb   |
|  |  |  |  |  |  |  |  |  | Pdgfa   |
|  |  |  |  |  |  |  |  |  | Pdim5   |

|  |  |  |  |  |  |  |  |  |           |
|--|--|--|--|--|--|--|--|--|-----------|
|  |  |  |  |  |  |  |  |  | Pdlim7    |
|  |  |  |  |  |  |  |  |  | Pdzd2     |
|  |  |  |  |  |  |  |  |  | Pgap1     |
|  |  |  |  |  |  |  |  |  | Pkhd111   |
|  |  |  |  |  |  |  |  |  | Plcd1     |
|  |  |  |  |  |  |  |  |  | Plch1     |
|  |  |  |  |  |  |  |  |  | Pld3      |
|  |  |  |  |  |  |  |  |  | Ppp1r13b  |
|  |  |  |  |  |  |  |  |  | Pqlc1     |
|  |  |  |  |  |  |  |  |  | Prdx3     |
|  |  |  |  |  |  |  |  |  | Prkab1    |
|  |  |  |  |  |  |  |  |  | Prph      |
|  |  |  |  |  |  |  |  |  | Prrg3     |
|  |  |  |  |  |  |  |  |  | Prrt4     |
|  |  |  |  |  |  |  |  |  | Prss35    |
|  |  |  |  |  |  |  |  |  | Prss8     |
|  |  |  |  |  |  |  |  |  | Pygm      |
|  |  |  |  |  |  |  |  |  | Qsox1     |
|  |  |  |  |  |  |  |  |  | Rarres2   |
|  |  |  |  |  |  |  |  |  | Rasal1    |
|  |  |  |  |  |  |  |  |  | Rasl10a   |
|  |  |  |  |  |  |  |  |  | Rassf10   |
|  |  |  |  |  |  |  |  |  | Rbm47     |
|  |  |  |  |  |  |  |  |  | Rbms2     |
|  |  |  |  |  |  |  |  |  | Rbpms2    |
|  |  |  |  |  |  |  |  |  | Reep1     |
|  |  |  |  |  |  |  |  |  | Rin2      |
|  |  |  |  |  |  |  |  |  | Rnd3      |
|  |  |  |  |  |  |  |  |  | Rnf128    |
|  |  |  |  |  |  |  |  |  | Rogdi     |
|  |  |  |  |  |  |  |  |  | Rragd     |
|  |  |  |  |  |  |  |  |  | Rrbp1     |
|  |  |  |  |  |  |  |  |  | Rrm1      |
|  |  |  |  |  |  |  |  |  | Rspo1     |
|  |  |  |  |  |  |  |  |  | Rtn1      |
|  |  |  |  |  |  |  |  |  | Rtn4r1    |
|  |  |  |  |  |  |  |  |  | S100a1    |
|  |  |  |  |  |  |  |  |  | Sbspon    |
|  |  |  |  |  |  |  |  |  | Scube2    |
|  |  |  |  |  |  |  |  |  | Sec31a    |
|  |  |  |  |  |  |  |  |  | Sec61a1   |
|  |  |  |  |  |  |  |  |  | Sema3a    |
|  |  |  |  |  |  |  |  |  | Sema3f    |
|  |  |  |  |  |  |  |  |  | Serinc3   |
|  |  |  |  |  |  |  |  |  | Serpina3g |
|  |  |  |  |  |  |  |  |  | Serpinb1a |

|  |  |  |  |  |  |  |  |           |
|--|--|--|--|--|--|--|--|-----------|
|  |  |  |  |  |  |  |  | Serping1  |
|  |  |  |  |  |  |  |  | Setd7     |
|  |  |  |  |  |  |  |  | Sft2d2    |
|  |  |  |  |  |  |  |  | Sgpl1     |
|  |  |  |  |  |  |  |  | Sh2d4a    |
|  |  |  |  |  |  |  |  | Sh3bp5    |
|  |  |  |  |  |  |  |  | Sik1      |
|  |  |  |  |  |  |  |  | Slc29a1   |
|  |  |  |  |  |  |  |  | Slc31a2   |
|  |  |  |  |  |  |  |  | Slc38a4   |
|  |  |  |  |  |  |  |  | Slc48a1   |
|  |  |  |  |  |  |  |  | Slc4a4    |
|  |  |  |  |  |  |  |  | Slc9a3r1  |
|  |  |  |  |  |  |  |  | Slco5a1   |
|  |  |  |  |  |  |  |  | Smagp     |
|  |  |  |  |  |  |  |  | Socs3     |
|  |  |  |  |  |  |  |  | Spats2l   |
|  |  |  |  |  |  |  |  | Specc1    |
|  |  |  |  |  |  |  |  | Star      |
|  |  |  |  |  |  |  |  | Stat1     |
|  |  |  |  |  |  |  |  | Stat3     |
|  |  |  |  |  |  |  |  | Stx17     |
|  |  |  |  |  |  |  |  | Stx3      |
|  |  |  |  |  |  |  |  | Svs5      |
|  |  |  |  |  |  |  |  | Syng1     |
|  |  |  |  |  |  |  |  | Synpr     |
|  |  |  |  |  |  |  |  | Syt14     |
|  |  |  |  |  |  |  |  | Tchh      |
|  |  |  |  |  |  |  |  | Tenm3     |
|  |  |  |  |  |  |  |  | Tfcp2l1   |
|  |  |  |  |  |  |  |  | Tfeb      |
|  |  |  |  |  |  |  |  | Thra      |
|  |  |  |  |  |  |  |  | Timp2     |
|  |  |  |  |  |  |  |  | Tinagl1   |
|  |  |  |  |  |  |  |  | Tjp2      |
|  |  |  |  |  |  |  |  | Tln1      |
|  |  |  |  |  |  |  |  | Tm4sf5    |
|  |  |  |  |  |  |  |  | Tmem151a  |
|  |  |  |  |  |  |  |  | Tmem151b  |
|  |  |  |  |  |  |  |  | Tmem65    |
|  |  |  |  |  |  |  |  | Tmem98    |
|  |  |  |  |  |  |  |  | Tnfaip8   |
|  |  |  |  |  |  |  |  | Tnfrsf12a |
|  |  |  |  |  |  |  |  | Tnfrsf19  |
|  |  |  |  |  |  |  |  | Tnfrsf1a  |
|  |  |  |  |  |  |  |  | Tnfrsf1b  |

|  |  |  |  |  |  |  |  |  |          |
|--|--|--|--|--|--|--|--|--|----------|
|  |  |  |  |  |  |  |  |  | Tnks1bp1 |
|  |  |  |  |  |  |  |  |  | Tnni1    |
|  |  |  |  |  |  |  |  |  | Tox3     |
|  |  |  |  |  |  |  |  |  | Tram1    |
|  |  |  |  |  |  |  |  |  | Trib1    |
|  |  |  |  |  |  |  |  |  | Tspan1   |
|  |  |  |  |  |  |  |  |  | Tspan5   |
|  |  |  |  |  |  |  |  |  | Twsg1    |
|  |  |  |  |  |  |  |  |  | Ube2l6   |
|  |  |  |  |  |  |  |  |  | Upk1b    |
|  |  |  |  |  |  |  |  |  | Upk3b    |
|  |  |  |  |  |  |  |  |  | Vat1l    |
|  |  |  |  |  |  |  |  |  | Vcl      |
|  |  |  |  |  |  |  |  |  | Vdr      |
|  |  |  |  |  |  |  |  |  | Vsnl1    |
|  |  |  |  |  |  |  |  |  | Vwa5a    |
|  |  |  |  |  |  |  |  |  | Wdtdc1   |
|  |  |  |  |  |  |  |  |  | Wls      |
|  |  |  |  |  |  |  |  |  | Xpnpep2  |
|  |  |  |  |  |  |  |  |  | Zfyve21  |
