# Supplementary material
Source: PubMed Central journal article supplement (PMC9767675)
Supplement: supplementary_table_1-01-03-2022_ioac111.pdf [file supplementary_table_1-01-03-2022_ioac111.pdf]

| Antibody | Manufacturer | Catalogue Number | Host species |
|----------|--------------|------------------|--------------|
| BMP2     | Abcam        | Ab214821         | Rabbit       |
| FOXL2    | Abcam        | Ab5096           | Goat         |
| GATA2    | ProteinTech  | 11103-1-AP       | Rabbit       |
| GATA4    | Abcam        | Ab124265         | Rabbit       |
| EGR2     | Aviva        | 100880           | Rabbit       |
| Hepsin   | LS-BIO       | Ls-B6933         | Rabbit       |
| GCNA     | Abcam        | Ab82527          | Rat          |

Supplementary Table 1: Chakraborty, Anderson and Roy
