# Supplementary material
Source: PubMed Central journal article supplement (PMC9767675)
Supplement: supplementary_table_2-01-03-2022_ioac111.pdf [file supplementary_table_2-01-03-2022_ioac111.pdf]

| Gene          | Forward primers          | Reverse primers       |
|---------------|--------------------------|-----------------------|
| <i>BMP2</i>   | GCTGGTCACAGATAAGGCCA     | TGTGTTTGGCTTGACGCTTT  |
| <i>Gata2</i>  | ATACCCACCTATCCCTCCTATGTG | GCCTCCTGGATGGAAGAGACT |
| <i>Gata4</i>  | TCCAGTGCTGTCTGCTCTGAA    | TGGCCTGCGATGTCTGAGT   |
| <i>Egr2</i>   | ACGGGACCAGGAGCAAGTG      | CGTTTTGCTGGGCCTGTTA   |
| <i>Hepsin</i> | TCTGCATCTTTCCCACCAAAT    | TGGGATTCCCCGCCATA     |
| <i>GAPDH</i>  | TGCAGTGGCAAAGTGGAGAT     | ACTGTGCCGTTGAATTTGCC  |

Supplementary Table 2: Chakraborty, Anderson and Roy
