# Supplementary material
Source: PubMed Central journal article supplement (PMC9767675)

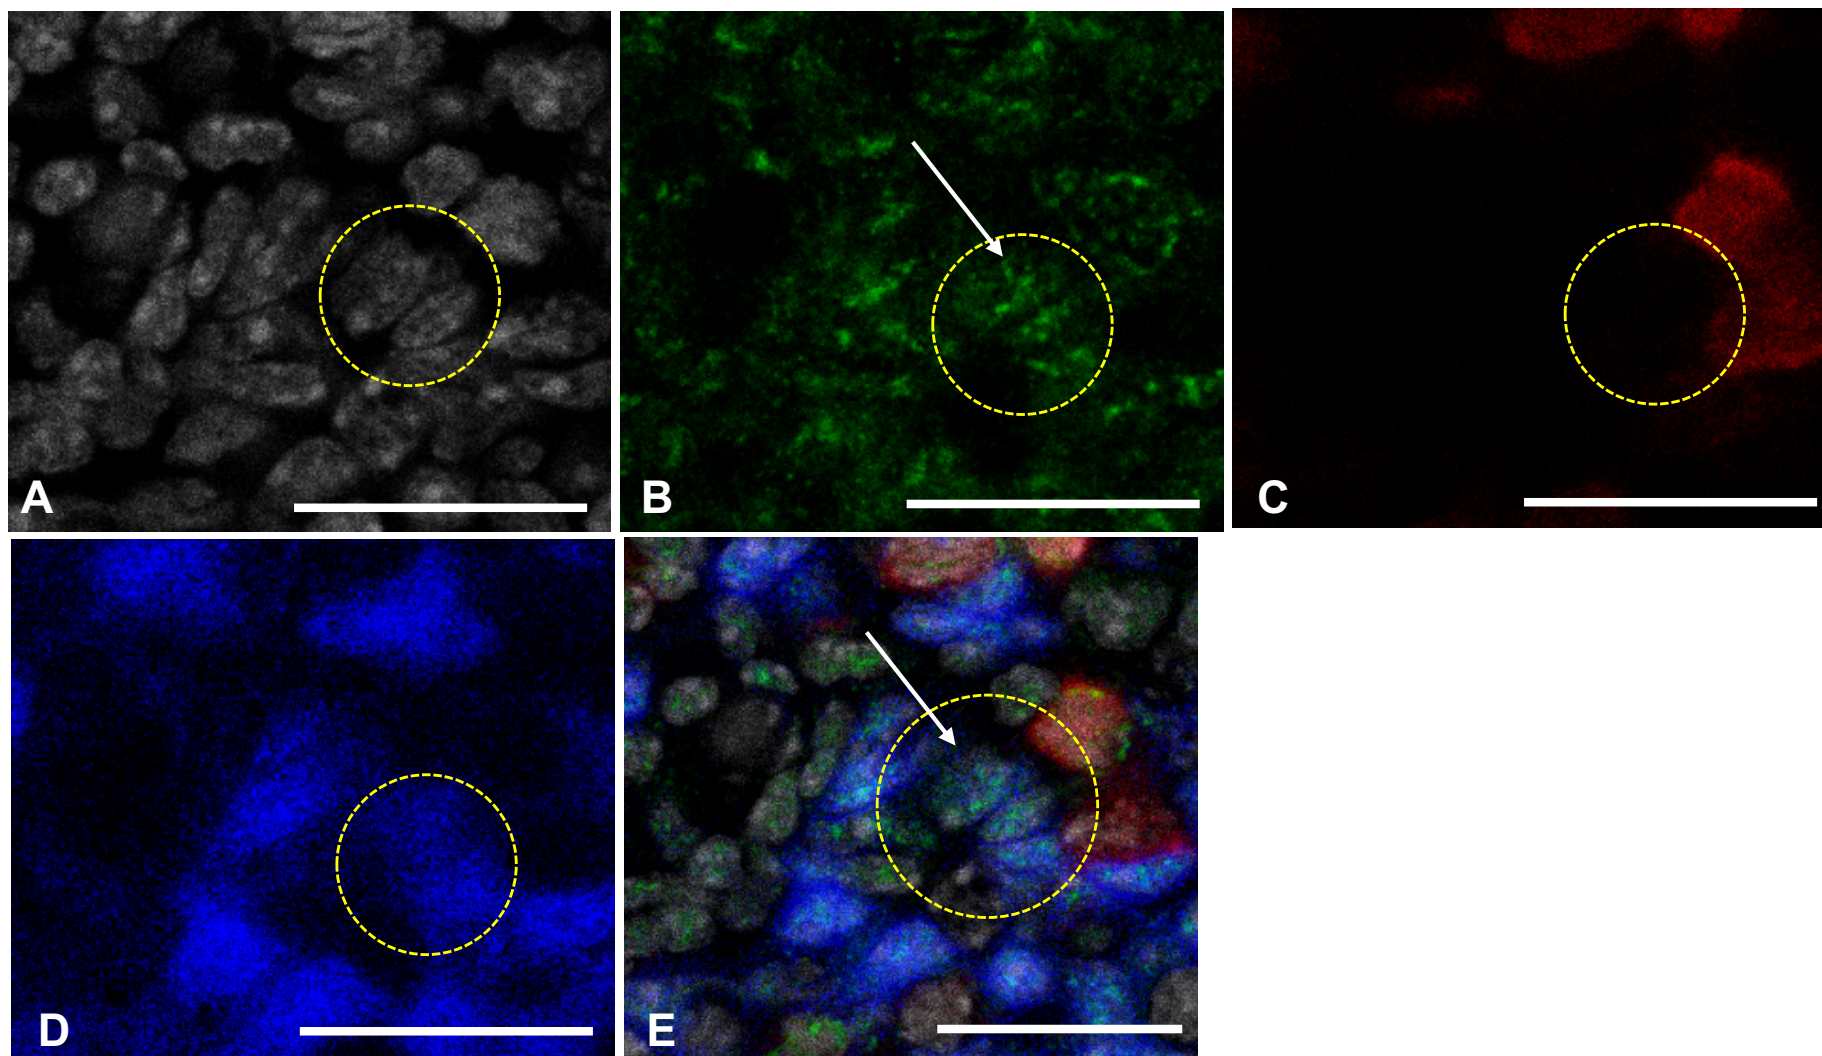

Supplementary Fig. S2: Chakraborty, Anderson and Roy

Supplement: suppl_fig_-2-3-8-2022_ioac111.pdf [file suppl_fig_-2-3-8-2022_ioac111.pdf]

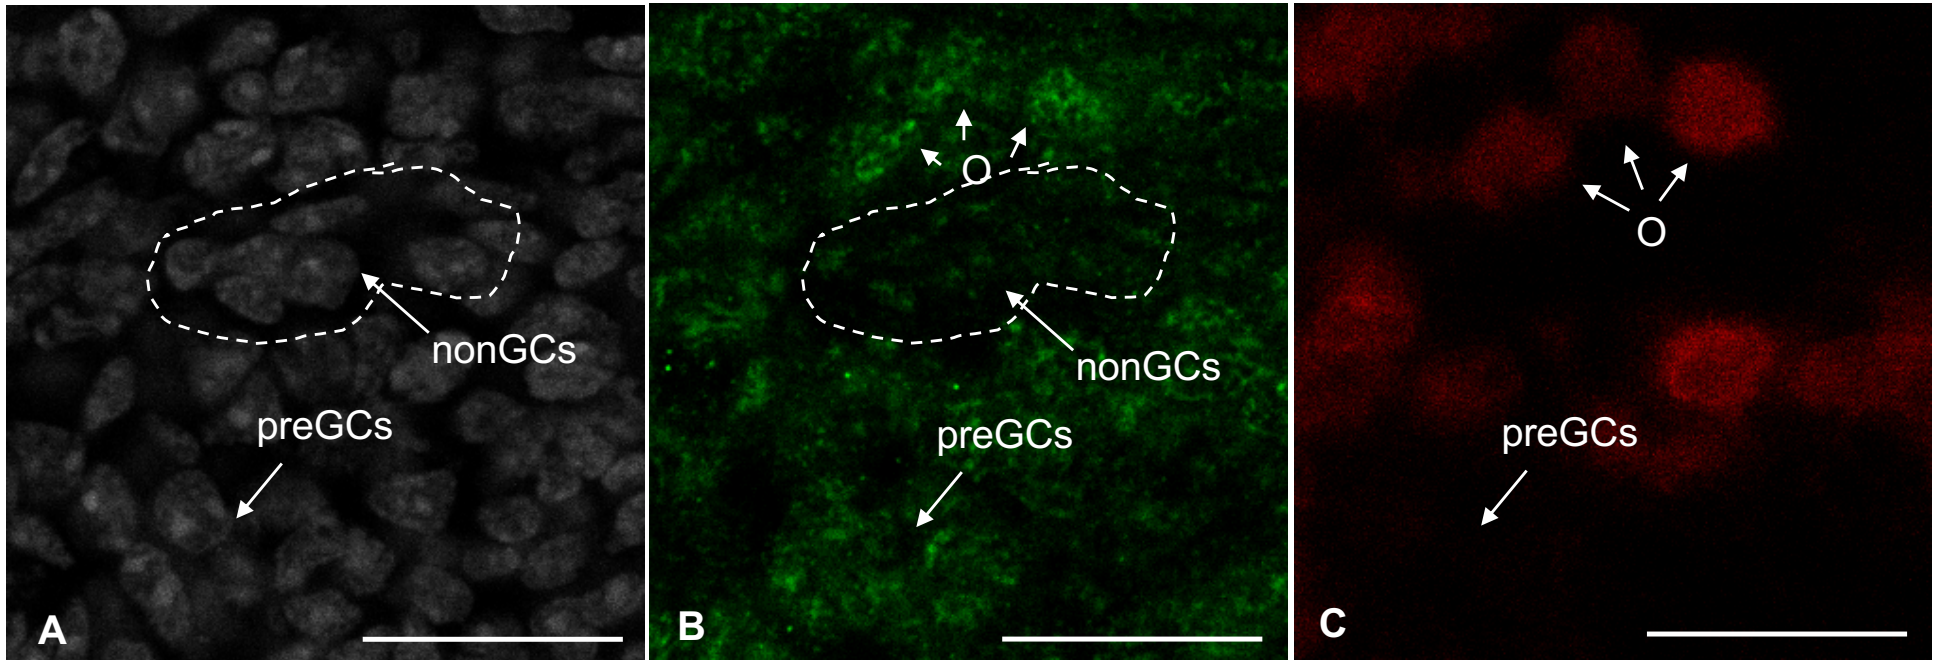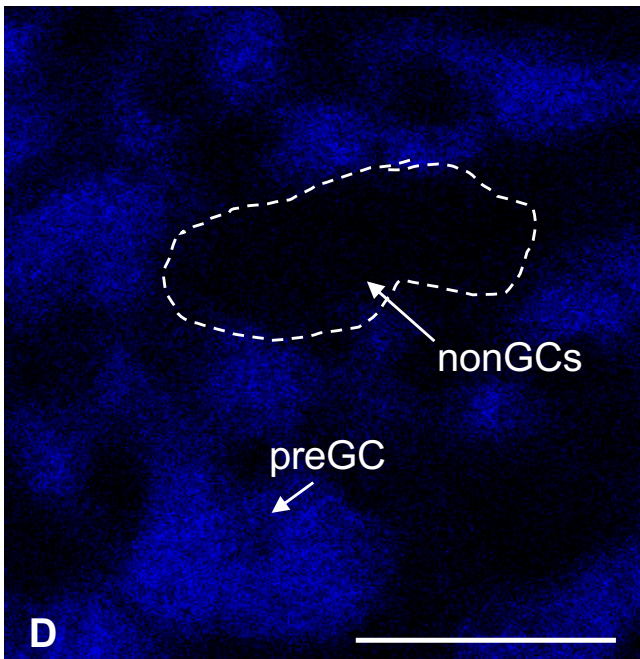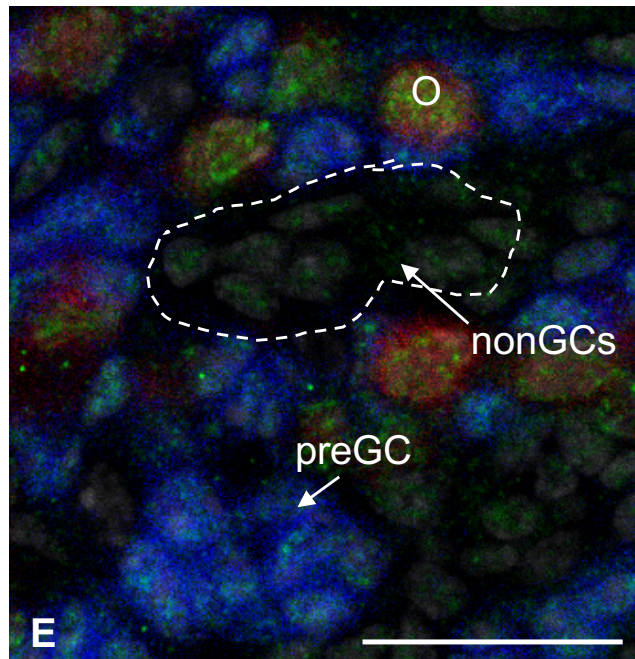

Supplementary Fig. S3: Chakraborty, Anderson and Roy

Supplement: suppl_fig_-3-3-8-2022_ioac111.pdf [file suppl_fig_-3-3-8-2022_ioac111.pdf]

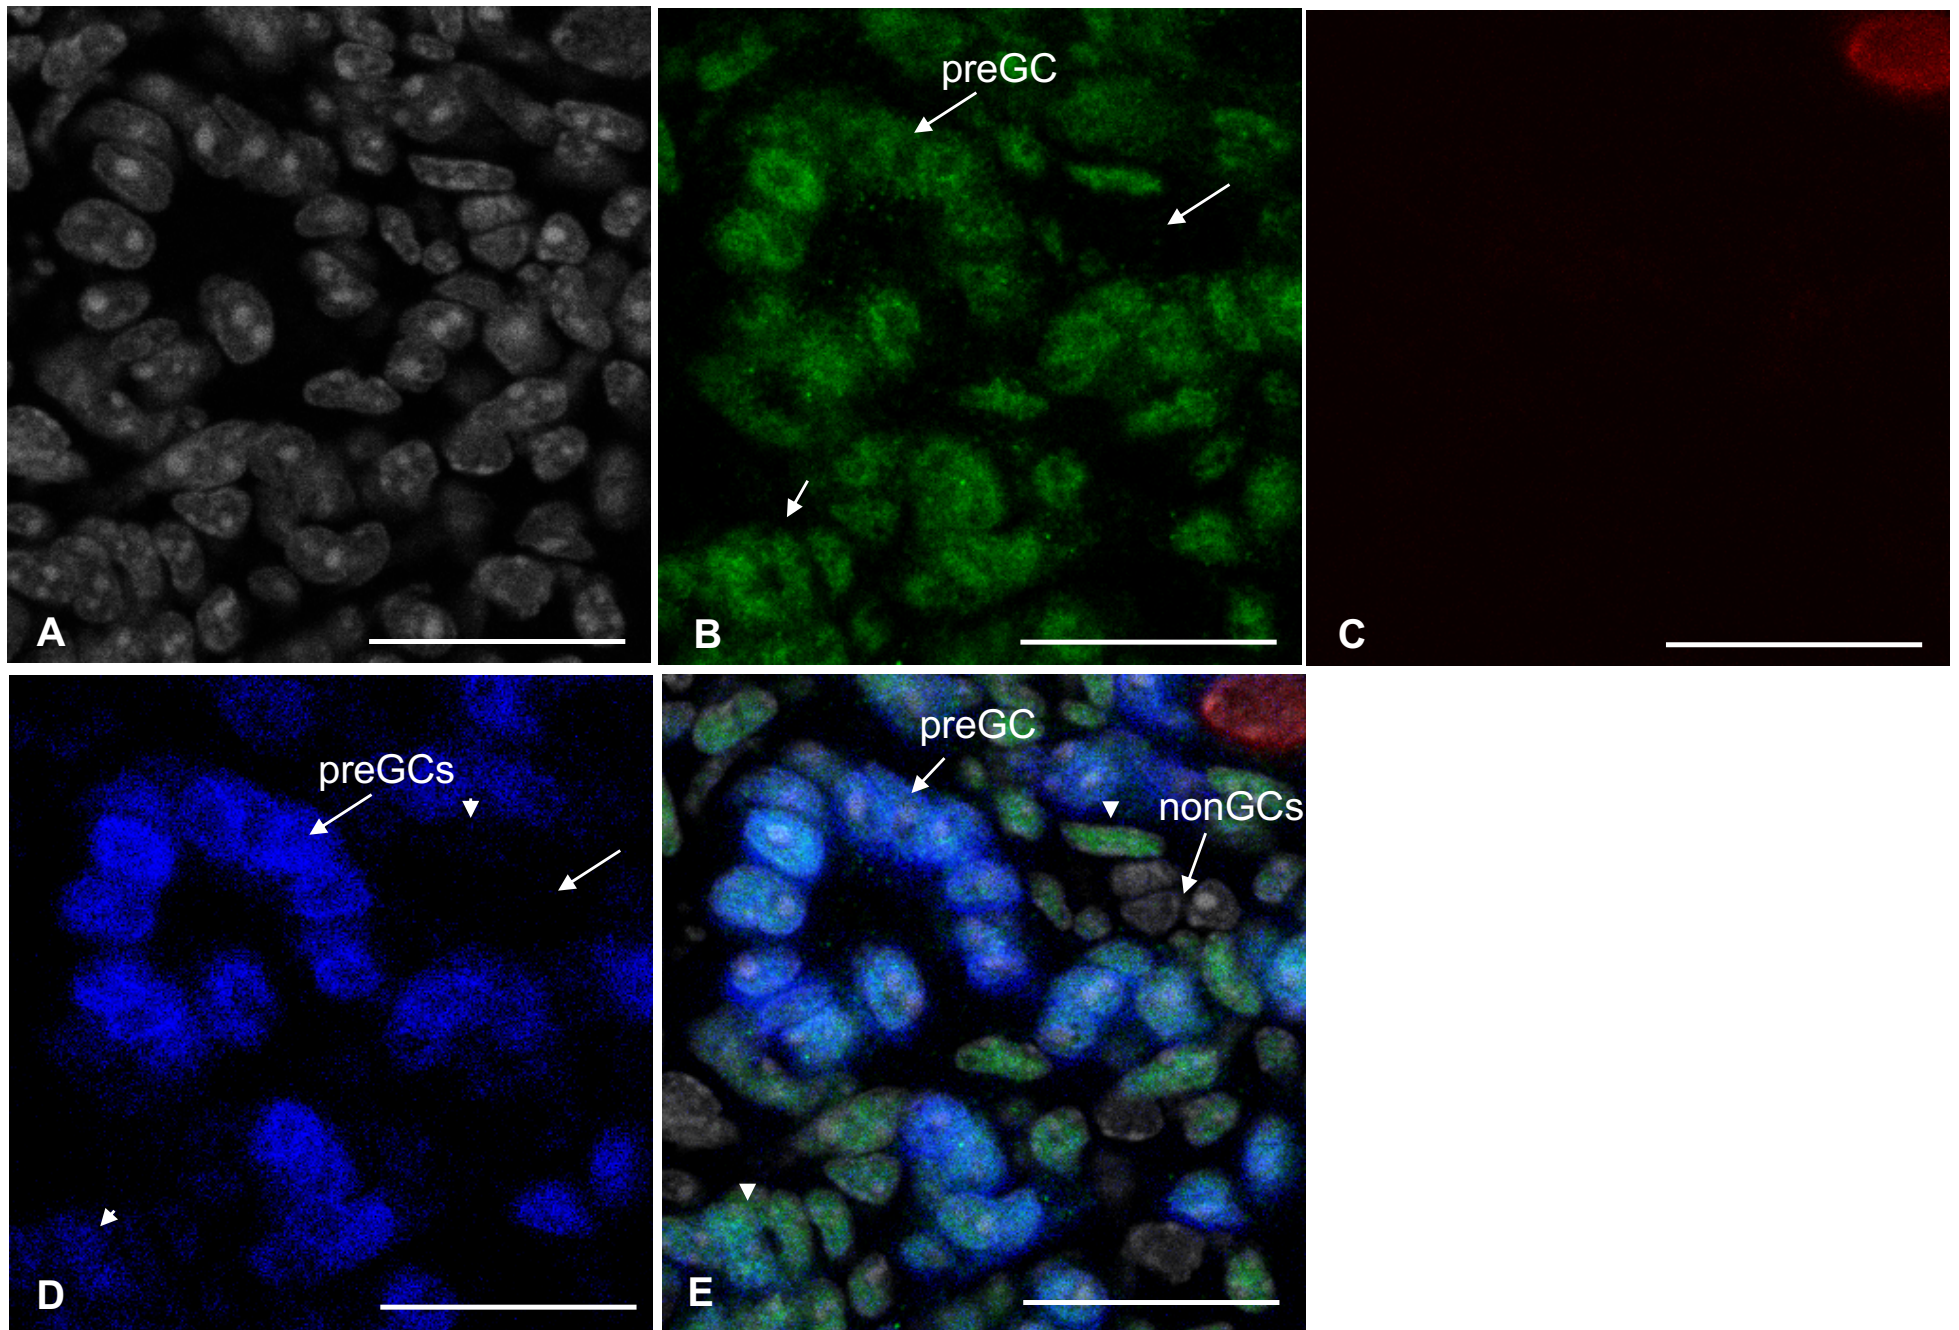

Supplementary Fig. S4: Chakraborty, Anderson and Roy

Supplement: suppl_fig_-4-3-8-2022_ioac111.pdf [file suppl_fig_-4-3-8-2022_ioac111.pdf]

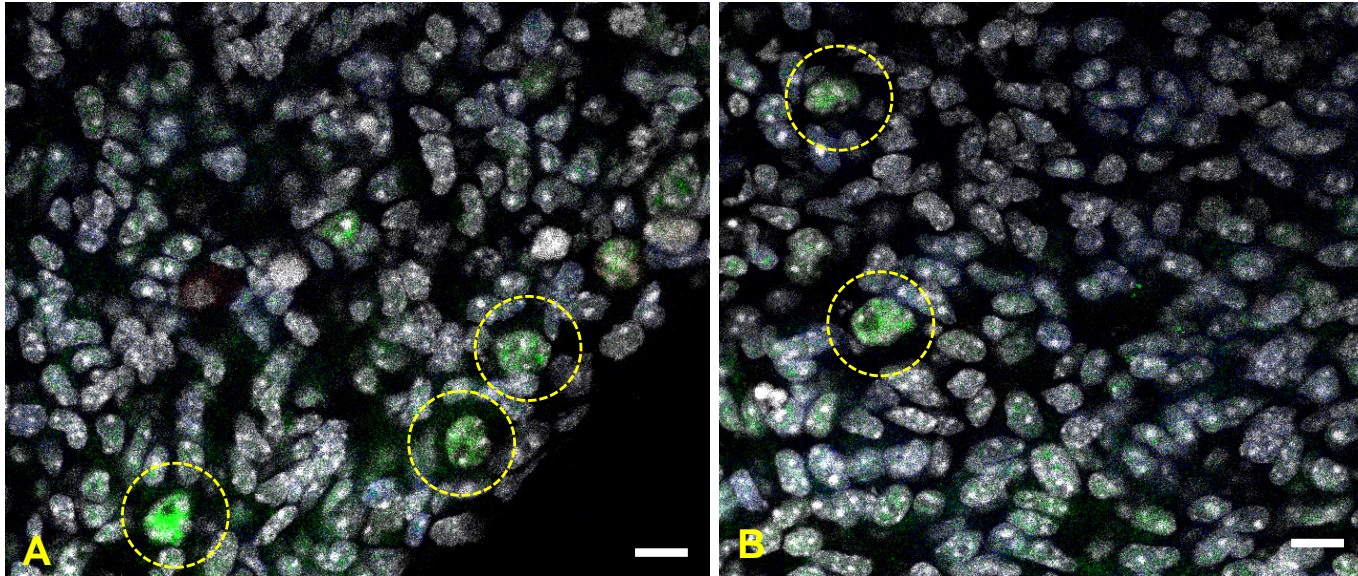

Supplementary Figure S5: Chakraborty, Anderson and Roy

Supplement: suppl_fig_-5-3-8-2022_ioac111.pdf [file suppl_fig_-5-3-8-2022_ioac111.pdf]

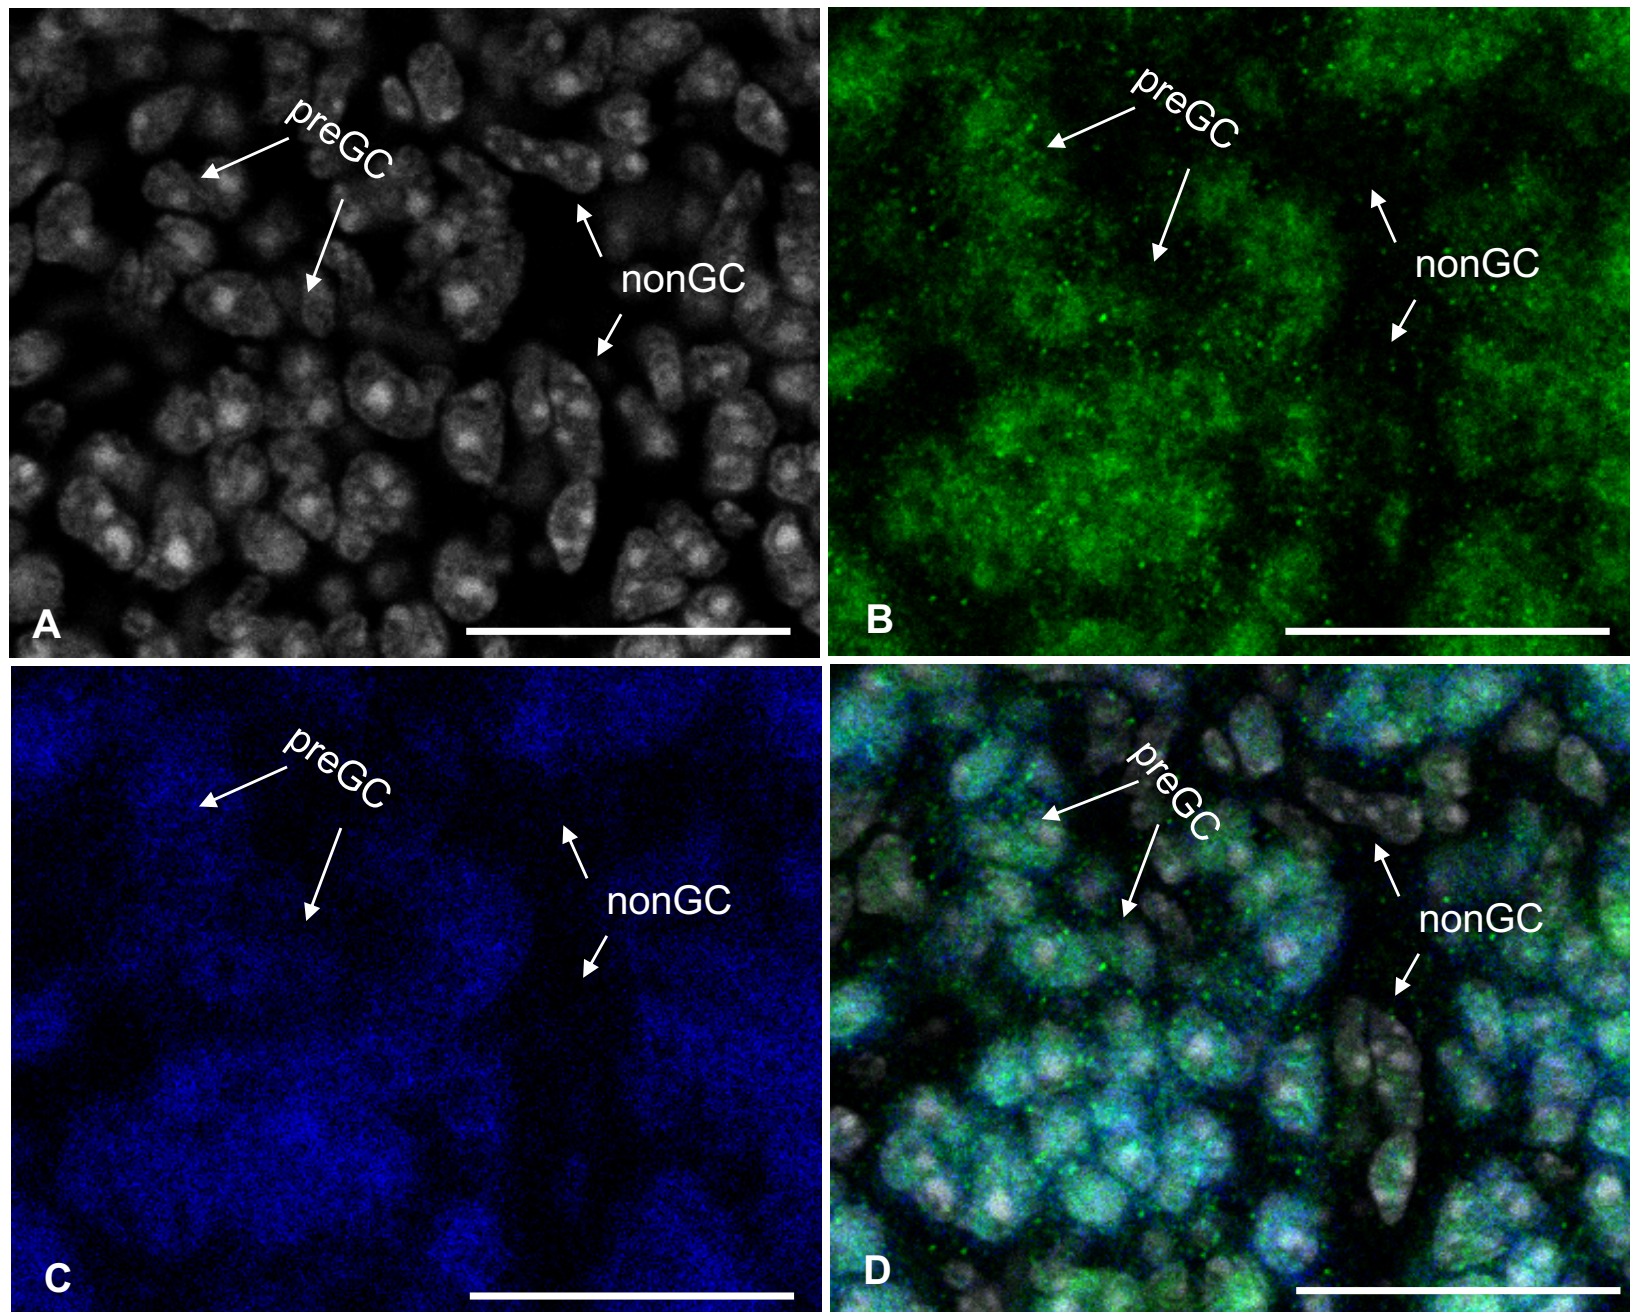

Supplementary Fig. S6: Chakraborty, Anderson and Roy

Supplement: suppl_fig_-6-3-8-2022_ioac111.pdf [file suppl_fig_-6-3-8-2022_ioac111.pdf]
